# Supplementary material
Source: PubMed Central journal article supplement (PMC3914619)
Supplement: 71fdf86777a126a4e962da10ea1dfab7_genetics.113.155218-5.pdf [file 71fdf86777a126a4e962da10ea1dfab7_genetics.113.155218-5.pdf]

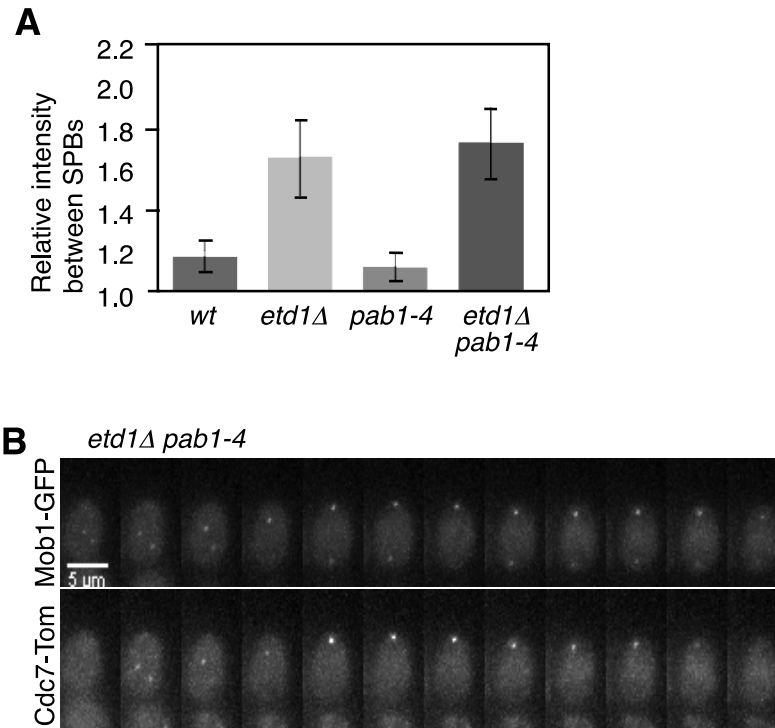

**Figure S3** Influence of Etd1 in the symmetric localization of Sid2-Mob1 at the SPBs. (A) Mob1-GFP fluorescence intensity at the two SPBs was quantified (arbitrary units) at their maximal levels (reaching maximal spindle elongation) in ten cells of each strain, and the average values of the related intensity between SPBs (Intensity of the Brighter SPB/intensity of the partner) are represented. Error bars indicate SEM. (B) Mob1-GFP and Cdc7-Tom were imaged in live *etd1Δ pab1-4* cells by time-lapse microscopy at 5 min intervals at 25°C, restrictive conditions for *etd1Δ* mutants. Given that Spg1 is activated at the new SPB (SPBd), co-expression of Mob1-GFP and Cdc7-GFP in *etd1Δ pab1-4* cells allows identifying the SPB at which Mob1 is specifically enriched in Etd1-depleted cells.
