# Supplementary material
Source: PubMed Central journal article supplement (PMC3914619)
Supplement: 72aea59e345cc8fd22ce97ca2e51408e_genetics.113.155218-1.pdf [file 72aea59e345cc8fd22ce97ca2e51408e_genetics.113.155218-1.pdf]

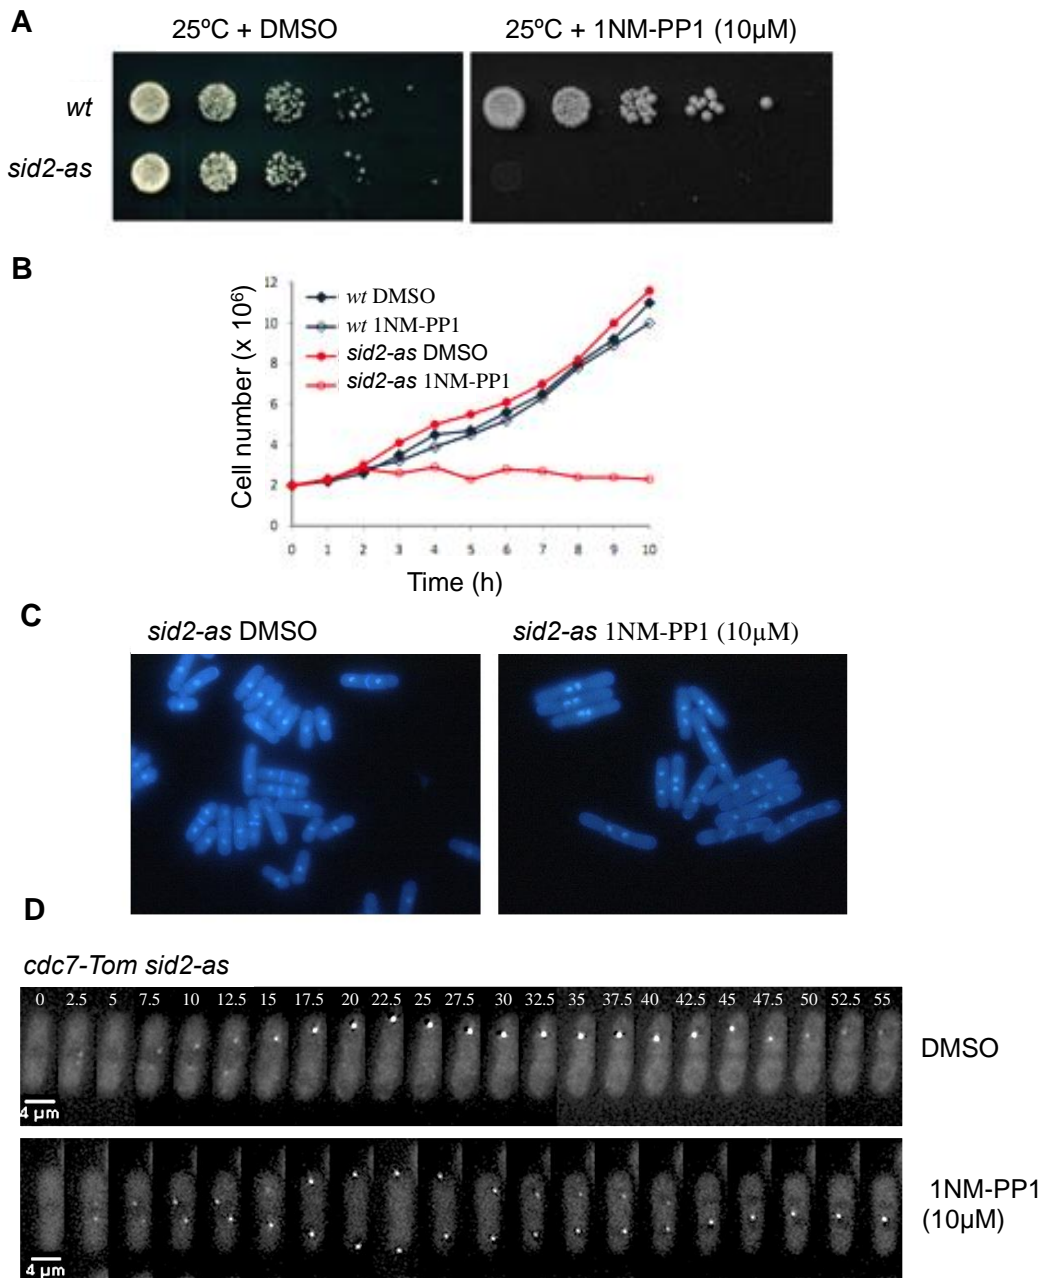

**Figure S1** Characterization of the *sid2-as* allele. (A) Growth assay (serial dilution drop tests on plates) of *sid2-as* cells in YES media + DMSO (left panels) and YES with 10µM 1NMPP1 (right panels). The wild type strain was used as controls. Cells were grown at 25°C for and 10-fold dilutions (starting with 10<sup>4</sup> cells) were spotted and incubated at 32°C. Similar results were obtained upon incubation at 25°C and 35°C (not shown). (B) Increase in cell number (determined by direct counting cell/ml under de microscope in a counting chamber) of the *sid2-as* strain incubated at 32°C in YES with DMSO (control) or with 10µM 1NMPP1. The wild type strain was used as control. (C) Dapi staining of *sid2-as* cells incubated at 32°C in YES with DMSO (left panel) or with 10µM 1NMPP1 (right panels). (D) SPB localization of Cdc7-Tom expressed in *sid2-as* cells incubated at 32°C in YES with DMSO (control) or with 10µM 1NMPP1.

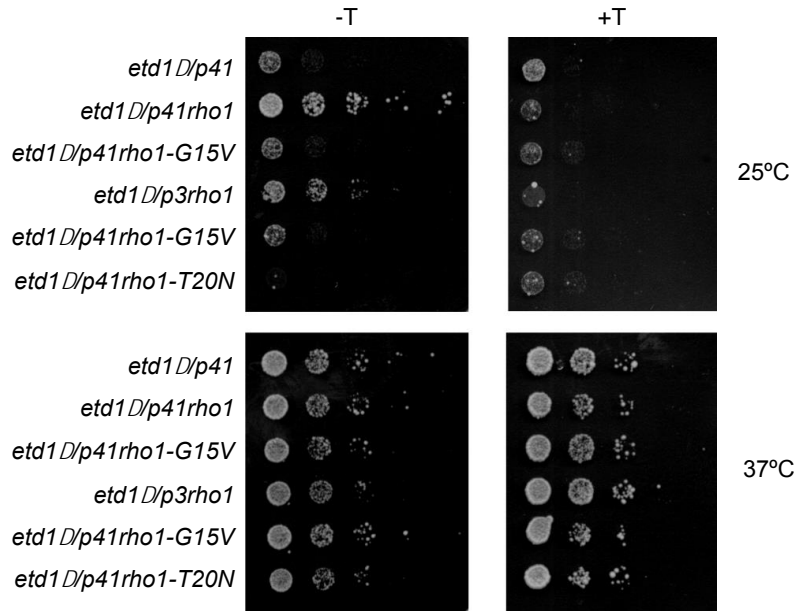

**Figure S2** Suppression of growth defects of the *etd1Δ* strain. Growth assay (serial dilution drop tests on plates) of *etd1Δ* cells transformed with the plasmid pREP41x empty (p41) or expressing *rho1<sup>+</sup>*, *rho1-T20N* and *rho1-G15V* alleles as indicated. Expression of *rho1<sup>+</sup>* with the pREP3x plasmid (*p3rho1*) and was also used. Cells were spotted in EMM with (+T) or without (-T) thiamine and incubated at the indicated temperature during 3 days.

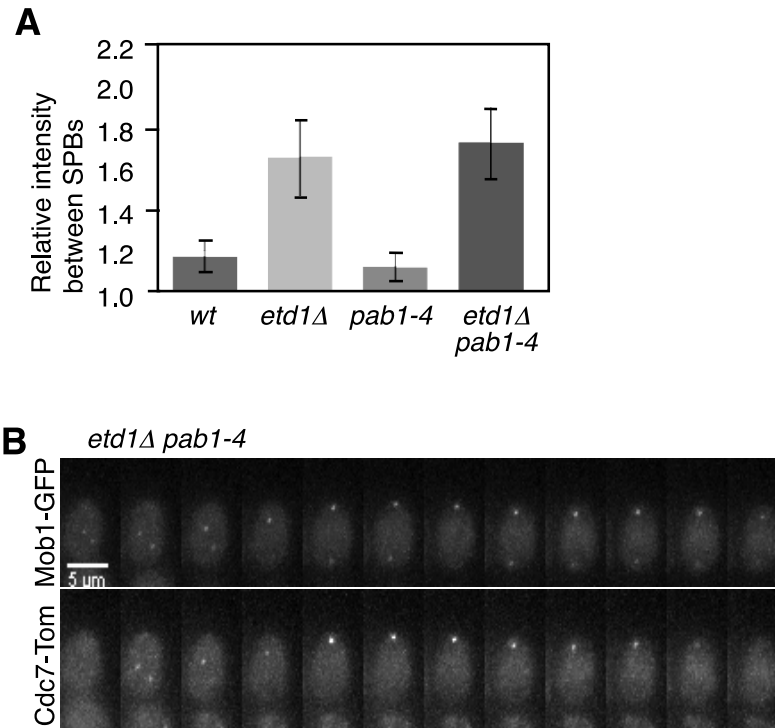

**Figure S3** Influence of Etd1 in the symmetric localization of Sid2-Mob1 at the SPBs. (A) Mob1-GFP fluorescence intensity at the two SPBs was quantified (arbitrary units) at their maximal levels (reaching maximal spindle elongation) in ten cells of each strain, and the average values of the related intensity between SPBs (Intensity of the Brighter SPB/intensity of the partner) are represented. Error bars indicate SEM. (B) Mob1-GFP and Cdc7-Tom were imaged in live *etd1Δ pab1-4* cells by time-lapse microscopy at 5 min intervals at 25°C, restrictive conditions for *etd1Δ* mutants. Given that Spg1 is activated at the new SPB (SPBd), co-expression of Mob1-GFP and Cdc7-GFP in *etd1Δ pab1-4* cells allows identifying the SPB at which Mob1 is specifically enriched in Etd1-depleted cells.

**Table S1 Strains used in this study.**

| Strain code | Genotype                                                                      | Source     |
|-------------|-------------------------------------------------------------------------------|------------|
| RD 312      | <i>ade6-216 leu1-32 ura4-D18</i>                                              | R. Daga    |
| RD 313      | <i>ade6-216 leu1-32 ura4-D18</i>                                              | R. Daga    |
| JJ 900      | <i>h+ leu1-32 ura4-D18 etd1::ura4</i>                                         | Lab. Stock |
| JJ 2034     | <i>h- leu1-32 ura4-D18 etd1::ura4</i>                                         | This study |
| JJ 1165     | <i>h- leu1-32/p41:EGFP:etd1-D1 (1-66aa)</i>                                   | This study |
| JJ 1166     | <i>h- leu1-32/p41:EGFP:etd1-D2 (1-133aa)</i>                                  | This study |
| JJ 1167     | <i>h- leu1-32/p41:EGFP:etd1-D3 (1-200aa)</i>                                  | This study |
| JJ 1168     | <i>h- leu1-32/p41:EGFP:etd1-D4 (1-300aa)</i>                                  | This study |
| JJ 1169     | <i>h- leu1-32/p41:EGFP:etd1-D5 (66-300aa)</i>                                 | This study |
| JJ 1170     | <i>h- leu1-32/p41:EGFP:etd1-D6 (133-300aa)</i>                                | This study |
| JJ 1171     | <i>h- leu1-32/p41:EGFP:etd1-D7 (200-300aa)</i>                                | This study |
| JJ 1197     | <i>h- leu1-32/p41:EGFP:etd1-D12 (66-133aa)</i>                                | This study |
| JJ 1198     | <i>h- leu1-32/p41:EGFP:etd1-D8 (66-391aa)</i>                                 | This study |
| JJ 1199     | <i>h- leu1-32/p41:EGFP:etd1-D9 (133-391aa)</i>                                | This study |
| JJ 1200     | <i>h- leu1-32/p41:EGFP:etd1-D10 (200-391aa)</i>                               | This study |
| JJ 1231     | <i>h- leu1-32/p41:EGFP:etd1-D12N (66-100aa)</i>                               | This study |
| JJ 1232     | <i>h- leu1-32/p41:EGFP:etd1-D12C (100-133aa)</i>                              | This study |
| JJ 1233     | <i>h- leu1-32/p41:EGFP:etd1</i>                                               | Lab. Stock |
| JJ 1235     | <i>h- leu1-32/p41:EGFP</i>                                                    | Lab. Stock |
| JJ 1264     | <i>h- leu1-32 /p41:EGFP:etd1-D11 (300-391aa)</i>                              | This study |
| JJ 1359     | <i>ade6-216 leu1-32 ura4-D18 etd1::ura4/p41:EGFP:etd1-D1 (1-66aa)</i>         | This study |
| JJ 1360     | <i>ade6-216 leu1-32 ura4-D18 etd1::ura4/p41:EGFP:etd1-D2 (1-133aa)</i>        | This study |
| JJ 1361     | <i>ade6-216 leu1-32 ura4-D18 etd1::ura4/p41:EGFP:etd1-D3 (1-200aa)</i>        | This study |
| JJ 1362     | <i>ade6-216 leu1-32 ura4-D18 etd1::ura4/p41:EGFP:etd1 D4 (1-300aa)</i>        | This study |
| JJ 1363     | <i>ade6-216 leu1-32 ura4-D18 etd1::ura4/p41:EGFP:etd1 D5 (66-300aa)</i>       | This study |
| JJ 1364     | <i>ade6-216 leu1-32 ura4-D18 etd1::ura4/p41:EGFP:etd1 D6 (133-300aa)</i>      | This study |
| JJ 1365     | <i>ade6-216 leu1-32 ura4-D18 etd1::ura4/p41:EGFP:etd1 D7 (200-300aa)</i>      | This study |
| JJ 1366     | <i>ade6-216 leu1-32 ura4-D18 etd1::ura4/p41:EGFP:etd1-D12 (66-133aa)</i>      | This study |
| JJ 1367     | <i>h- ade6-216 leu1-32 ura4-D18 etd1::ura4/p41:EGFP:etd1 D8 (66-391aa)</i>    | This study |
| JJ 1368     | <i>h+ ade6-216 leu1-32 ura4-D18 etd1::ura4/p41:EGFP:etd1 D9 (133-391aa)</i>   | This study |
| JJ 1369     | <i>h- ade6-216 leu1-32 ura4-D18 etd1::ura4/ p41:EGFP:etd1-D10 (200-391aa)</i> | This study |
| JJ 1370     | <i>h- ade6-216 leu1-32 ura4-D18 etd1::ura4/p41:EGFP:etd1</i>                  | Lab. Stock |
| JJ 1372     | <i>ade6-216 leu1-32 ura4-D18 etd1::ura4/p41:EGFP</i>                          | Lab. Stock |
| RD 701      | <i>h+ ade6- leu1-32 ura4-D18 cdc7::Tom:Nat</i>                                | Fred Chang |

|         |                                                                      |             |
|---------|----------------------------------------------------------------------|-------------|
| JJ 1705 | <i>h- ade6- leu1-32 ura4-D18 cdc7:Tom:Nat</i>                        | This study  |
| JJ 1692 | <i>ade6- leu1-32 ura4-D18 cdc7:Tom:Nat etd1::ura4</i>                | This study  |
| JJ 1421 | <i>ade6- leu1-32 ura4-D18 cdc7:Tom:Nat pab1-4</i>                    | This study  |
| JJ 1690 | <i>ade6- leu1-32 ura4-D18 cdc7:Tom:Nat etd1::ura4 pab1-4</i>         | This study  |
| JJ 1723 | <i>h- ade6- leu1-32 ura4-D18 cdc7:Tom:Nat rlc1:GFP:Kan</i>           | This study  |
| JJ 1724 | <i>h+ leu1-32 ura4-D18 cdc7:Tom:Nat rlc1:GFP:Kan</i>                 | This study  |
| RD 702  | <i>h+ leu1-32 ura4-D18 rlc1:Tom:Nat</i>                              | Fred Chang  |
| JJ 774  | <i>h- leu1-32 ura4-D18 mob1:GFP:kan</i>                              | Lab. Stock  |
| JJ 1838 | <i>ade- leu1-32 ura4-D18 mob1:GFP:kan etd1::ura4 nmt81:etd1</i>      | This study  |
| JJ 1839 | <i>leu1-32 ura4-D18 mob1:GFP:kan etd1::ura4 pab1-4</i>               | This study  |
| JJ 1782 | <i>h- leu1-32 ura4-D18 rlc1:Tom:NatR mob1:GFP:Kan</i>                | This study  |
| JJ 1784 | <i>h- ade6- leu1-32 ura4-D18 rlc1:Tom:NatR mob1:GFP:Kan pab1-4</i>   | This study  |
| JJ 1785 | <i>h+ leu1-32 ura4-D18 rlc1:Tom:NatR mob1:GFP:Kan pab1-4</i>         | This study  |
| JJ 1840 | <i>leu1-32 ura4-D18 rlc1:Tom:NatR mob1:GFP:Kan pab1-4 etd1::ura4</i> | This study  |
| JJ 1372 | <i>ade6- leu1-32 ura4-D18 etd1::ura4/p41:EGFP</i>                    | This study  |
| JJ 1370 | <i>h- ade6- leu1-32 ura4-D18 etd1::ura4/p41:EGFP:etd1</i>            | This study  |
| JJ 1273 | <i>ade6- leu1-32 ura4-D18 etd1:ura4/p41:HA:rho1</i>                  | This study  |
| JJ 1750 | <i>leu1-32 ura4-D18 ade6- cdc7:Tom:Nat/p41:HA:rho1</i>               | This study  |
| JJ 1752 | <i>leu1-32 ura4-D18 ade6- cdc7:Tom:Nat etd1::ura4/p41:HA:rho1</i>    | This study  |
| JJ 1139 | <i>h- ade6- leu1-32 HA:rho1:ura4</i>                                 | Pilar Pérez |
| JJ 1201 | <i>etd1::ura4 HA:rho1:ura4</i>                                       | Lab. Stock  |
| JJ 1157 | <i>h- leu1-32 ade6- HA:rho1:ura4 pab1-4</i>                          | Lab. Stock  |
| JJ 1184 | <i>leu1-32 ade6- HA:rho1:ura4 pab1-4 etd1::ura4</i>                  | Lab. Stock  |
| JJ 1310 | <i>h+leu1-32 ade6- HA:rho1:ura4 /p41:EGFP:etd1</i>                   | This study  |
| JJ 1879 | <i>h+leu1-32 ade6- HA:rho1:ura4 /p3:pab1</i>                         | This study  |
| JJ 1541 | <i>leu1-32 ade6- HA:rho1:ura4 /p41:EGFP</i>                          | This study  |
| JJ 2034 | <i>h- leu1-32 ura4-D18 etd1::ura4 nmt81:etd1</i>                     | Lab. Stock  |
| JJ 2035 | <i>h+ leu1-32 ura4-D18 etd1::ura4 nmt81:etd1</i>                     | Lab. Stock  |
| JJ 1847 | <i>leu1-32 ura4-D18 ade- rga1::ura4</i>                              | Pilar Pérez |
| JJ 1849 | <i>h- leu1-32 ura4-D18 rga5::ura4</i>                                | Pilar Pérez |
| JJ 1850 | <i>h+ leu1-32 ura4-D18 rga5::ura4</i>                                | Pilar Pérez |
| JJ 2042 | <i>h- leu1-32 ura4-D18 rga8::Kan</i>                                 | Pilar Pérez |
| JJ 2020 | <i>leu1-32 ura4-D18 rga1::ura4 etd1::ura4</i>                        | This study  |
| JJ 2000 | <i>leu1-32 ura4-D18 rga5::ura4 etd1::ura4</i>                        | This study  |
| JJ 2061 | <i>leu1-32 ura4-D18 rga8::Kan etd1::ura4</i>                         | This study  |
| JJ 2119 | <i>leu1-32 ura4-D18 cdc7:Tom:Nat rga5::ura4</i>                      | This study  |

|         |                                                                       |             |
|---------|-----------------------------------------------------------------------|-------------|
| JJ 2113 | <i>leu1-32 ura4-D18 cdc7:Tom:Nat rga5::ura4 etd1::ura4 nmt81:etd1</i> | This study  |
| JJ 2151 | <i>ade6- leu1-32 ura4-D18 etd1:ura4 /p41:YFP:rgf1</i>                 | This study  |
| JJ 2152 | <i>ade6- leu1-32 ura4-D18 etd1:ura4 /p41:YFP:rgf2</i>                 | This study  |
| JJ 2173 | <i>ade6- leu1-32 ura4-D18 etd1:ura4/p41:rgf3</i>                      | This study  |
| JJ 1311 | <i>h+ leu1-32 ade6- HA:rho1:ura4 /p41:EGFP:etd1-D8 (66-391aa)</i>     | This study  |
| JJ 1312 | <i>h+ leu1-32 ade6- HA:rho1:ura4 /p41:EGFP:etd1-D10 (200-391aa)</i>   | This study  |
| JJ 1799 | <i>h+ leu1-32 cut11:GFP:ura4 cdc7:Tom:Nat</i>                         | This study  |
| JJ 1802 | <i>h- ura4-D18 sid2-as</i>                                            | This study  |
| JJ 1862 | <i>h+ ade6- leu1-32 ura4-D18 sid2-as</i>                              | This study  |
| JJ 1857 | <i>h+ ade6- leu1-32 ura4-D18 sid2-as cdc7:Tomato:Nat</i>              | This study  |
| RD 1407 | <i>h- ade6- leu1-32 ura4-D18 hob3::ura4</i>                           | Pilar Pérez |
| JJ 1906 | <i>h+ leu1-32 ura4-D18 cdc7:Tom:Nat rlc1:GFP:Kan hob3::ura4</i>       | This study  |
| JJ 1917 | <i>leu1-32 ura4-D18 cdc7:Tom:Nat rlc1:GFP:Kan drc1-191</i>            | This study  |
| JJ 2268 | <i>rho1::ura4/p41xRho1 ade6- leu1-32 ura4-d18</i>                     | Pilar Pérez |
| JJ 2305 | <i>cdc7:Tom:Nat rlc1:GFP:Kan drc1-191 rho1::ura4 p41rho1</i>          | This study  |
| JJ 2306 | <i>cdc7:Tom:Nat rlc1:GFP:Kan drc1-191 sid2-as</i>                     | This study  |

---
