# Supplementary material
Source: PubMed Central journal article supplement (PMC3914619)
Supplement: ae850ff49fad9a3e6e8baf72a0bfbd58_genetics.113.155218-2.pdf [file ae850ff49fad9a3e6e8baf72a0bfbd58_genetics.113.155218-2.pdf]

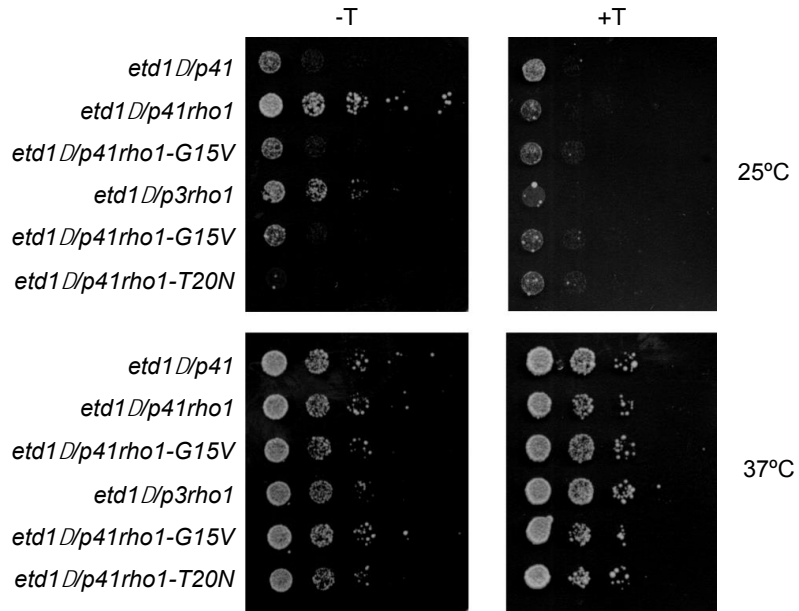

**Figure S2** Suppression of growth defects of the *etd1Δ* strain. Growth assay (serial dilution drop tests on plates) of *etd1Δ* cells transformed with the plasmid pREP41x empty (p41) or expressing *rho1<sup>+</sup>*, *rho1-T20N* and *rho1-G15V* alleles as indicated. Expression of *rho1<sup>+</sup>* with the pREP3x plasmid (*p3rho1*) and was also used. Cells were spotted in EMM with (+T) or without (-T) thiamine and incubated at the indicated temperature during 3 days.
